# Supplementary material for: Integrated transcriptomic and proteomic analysis reveals innate and adaptive immune dynamics in systemic autoinflammatory diseases
Source: Research Square preprint supplement (doi:10.21203/rs.3.rs-6173310/v1), 2025-11-01
Supplement: Supplementary file 1 [file 2ec9455f5c9b181613bf0bc4.pdf]

Supplementary Table 1. Brief summaries of genes found in figures 1-6, including protein name, predicted related response and function.

| Nr | Gene name        | Name of the encoded protein or RNA             | Response related to                                                | Function or status                                                                                                                                                                                                                               | Found in Figure | References |
|----|------------------|------------------------------------------------|--------------------------------------------------------------------|--------------------------------------------------------------------------------------------------------------------------------------------------------------------------------------------------------------------------------------------------|-----------------|------------|
| 1  | IL1B             | Interleukin 1 beta (IL-1B)                     | Proinflammatory responses of the innate immune system              | Proinflammatory cytokine produced by the cells of the innate immune system.                                                                                                                                                                      | 1-4             | 1          |
| 2  | PTGS2            | Prostaglandin-Endoperoxide Synthase 2          | Proinflammatory responses of the innate and adaptive immune system | Ptgs2 is induced to high levels during inflammation.                                                                                                                                                                                             | 1-4             | 2          |
| 3  | CXCL2            | C-X-C Motif Chemokine Ligand 2                 | Proinflammatory responses of the innate immune system              | Chemoattractant in innate immune cells.                                                                                                                                                                                                          | 1-4             | 3,4        |
| 4  | CXCL3            | C-X-C motif chemokine ligand 3                 | Proinflammatory responses of the innate immune system              | Knockdown of CXCL3-inhibits apoptosis and inflammation in lipopolysaccharide-treated BEAS-2B and HPAEC by inactivating the MAPKs pathway                                                                                                         | 1-4             | 5          |
| 5  | PTX3             | Pentraxin 3                                    | Proinflammatory responses of the innate immune system              | Produced by innate immunity cells, playing an essential role by tuning inflammation and matrix deposition.                                                                                                                                       | 1-4             | 6          |
| 6  | ATP2B1-AS1       | Non-protein coding RNA: ATP2B1 Antisense RNA 1 | Proinflammatory responses of the innate immune system              | ATP2B1-AS1 exacerbates sepsis-induced cell apoptosis and inflammation by regulating miR-23a-3p/TLR4 axis.                                                                                                                                        | 1-4             | 7          |
| 7  | ZFP36            | ZFP36 Ring Finger Protein                      | Anti-inflammatory responses of the adaptive immune system          | T cell homeostasis is contingent on the ZFP36 family of RNA-binding proteins, whereas T cell priming is dependent on ZFP36L1 and ZFP36L2. ZFP36 RNA-binding proteins have been demonstrated to impede T cell activation and anti-viral immunity. | 1-4             | 8,9        |
| 8  | SGK1             | Serum/Glucocorticoid Regulated Kinase 1        | Anti-inflammatory responses of the innate immune system            | SGK1 promotes Alternative Macrophage Polarization and Restrains Inflammation through FoxO1 and STAT3 signalling                                                                                                                                  | 1-4             | 10         |
| 9  | ATF3 (dual role) | Activating transcription factor 3 (ATF3)       | Both proinflammatory and anti-inflammatory responses of the        | ATF3 increases the production of pro-inflammatory cytokines and chemokines by enhancing AP1S2 expression by binding to AP1S2 promoters in inflammation.                                                                                          | 1-4             | 11         |

|    |        |                                             |                                                           |                                                                                                                                                                                                                                                                                                                                                                                                 |     |       |
|----|--------|---------------------------------------------|-----------------------------------------------------------|-------------------------------------------------------------------------------------------------------------------------------------------------------------------------------------------------------------------------------------------------------------------------------------------------------------------------------------------------------------------------------------------------|-----|-------|
|    |        |                                             | innate immune system                                      | ATF3 negatively regulates TLR-signalling pathways, thus inhibiting the production of inflammatory cytokines.                                                                                                                                                                                                                                                                                    |     |       |
| 10 | CXCL8  | C-X-C Motif Chemokine Ligand 8              | Proinflammatory responses of the innate immune system     | Lymphocyte recruitment through CXCL8.                                                                                                                                                                                                                                                                                                                                                           | 1-4 | 12    |
| 11 | BLNK   | B Cell Linker                               | Proinflammatory responses of the adaptive immune system   | <p>The adaptor protein BLNK is required for B cell antigen receptor-induced activation of nuclear factor-kappa B and cell cycle entry and survival of B lymphocytes.</p> <p>BLNK represents a central linker protein that bridges the B cell receptor–associated kinases with a multitude of signalling pathways and may regulate the biologic outcomes of B cell function and development.</p> | 1-4 | 13,14 |
| 12 | SPIB   | Transcription Factor Spi-B                  | Anti-inflammatory responses of the adaptive immune system | SPIB expression in fibroblastic reticular cells (FRCs) in the lymph nodes is critical for the expansion of the FRC network, which parallels and regulates the early priming and proliferation of CD8+ T cells during viral infection.                                                                                                                                                           | 1-4 | 15    |
| 13 | FCRLA  | Fc Receptor Like A                          | Proinflammatory responses of the adaptive immune system   | <p>FCRLA is a resident endoplasmic reticulum protein that is associated with intracellular Igs, IgM, IgG and IgA.</p> <p>High expression of FCRLA in subset(s) of terminally differentiated B-cells suggests that, being an ER protein, FCRLA may participate in the regulation of immunoglobulin assembly and secretion.</p>                                                                   | 1-4 | 16,17 |
| 14 | FAM30A | Family With Sequence Similarity 30 Member A | Proinflammatory responses of the adaptive immune system   | The expression of lncRNA FAM30A is high in B cells and correlates with the expression of immunoglobulin genes located in its genomic vicinity.                                                                                                                                                                                                                                                  | 1-4 | 18    |
| 15 | SNX22  | Sorting Nexin 22                            | Anti-inflammatory responses of the adaptive immune system | Genome-wide shRNA screening identifies SNX22, which is required for HIV-1 Nef-induced downregulation of CD4 in HeLa CD4+ cells.                                                                                                                                                                                                                                                                 | 1-4 | 19    |
| 16 | FCRL2  | Fc Receptor Like 2                          | Proinflammatory responses of the adaptive immune system   | FCRL2 gene encodes a member of the immunoglobulin receptor superfamily and is one of several Fc receptor-like glycoproteins clustered on the long arm of chromosome 1.                                                                                                                                                                                                                          | 1-4 | 20    |
| 17 | CD19   | CD19 Molecule                               | Proinflammatory responses of the adaptive immune system   | CD19 encodes a member of the immunoglobulin gene superfamily. Expression of this cell surface protein is restricted to B cell lymphocytes. This protein is a reliable marker for pre-B                                                                                                                                                                                                          | 1-4 | 21    |

|    |         |                                      |                                                                                             |                                                                                                                                                                                                                                                                                                                                                                                                                                                                                                              |     |       |
|----|---------|--------------------------------------|---------------------------------------------------------------------------------------------|--------------------------------------------------------------------------------------------------------------------------------------------------------------------------------------------------------------------------------------------------------------------------------------------------------------------------------------------------------------------------------------------------------------------------------------------------------------------------------------------------------------|-----|-------|
|    |         |                                      |                                                                                             | cells, but its expression diminishes during terminal B cell differentiation in antibody secreting plasma cells.                                                                                                                                                                                                                                                                                                                                                                                              |     |       |
| 18 | CD22    | CD22 Molecule                        | Anti-inflammatory responses of the adaptive immune system                                   | In CD19+ CD22+ CD9+ B cells, CD22 mediates the effects of Gal9 to promote immunotherapy for allergic diseases by inducing B10 cells. In an antigen-specific manner, the B10 cells suppressed CD4+ T cell activities, and alleviated experimental AR.<br><br>CD22 regulates the time course of both B cell division and antibody response.                                                                                                                                                                    | 1-4 | 22 23 |
| 19 | MS4A1   | Membrane Spanning 4-Domains A1       | Proinflammatory responses of the adaptive immune system                                     | MS4A1 encodes a B-lymphocyte surface molecule which plays a role in the development and differentiation of B-cells into plasma cells.                                                                                                                                                                                                                                                                                                                                                                        | 1-4 | 24    |
| 20 | IGHM    | Immunoglobulin Heavy Constant Mu     | Proinflammatory responses of the adaptive immune system                                     | Autosomal recessive agammaglobulinemia due to defect in $\mu$ heavy chain caused by a novel mutation in the IGHM gene                                                                                                                                                                                                                                                                                                                                                                                        | 1-4 | 25    |
| 21 | FOXP1   | Forkhead Box P1                      | Anti-inflammatory responses of the adaptive immune system                                   | Foxp1 binds to the conserved noncoding sequence 2 (CNS2) element of the Foxp3 locus and helps maintain Treg suppressive function by stabilizing the Foxp3 expression. Foxp1 and Foxp3 coordinate the regulation of cytotoxic T-lymphocyte-associated protein 4 (CTLA-4) expression levels.                                                                                                                                                                                                                   | 5   | 26    |
| 22 | ZFP36L2 | ZFP36 Ring Finger Protein Like 2     | Anti-inflammatory responses of the adaptive immune system                                   | T cell homeostasis is contingent on the ZFP36 family of RNA-binding proteins, whereas T cell priming is dependent on ZFP36L1 and ZFP36L2.<br><br>ZFP36 RNA-binding proteins have been demonstrated to impede T cell activation and anti-viral immunity.                                                                                                                                                                                                                                                      | 5   | 8,9   |
| 23 | LAS1L   | LAS1 Like Ribosome Biogenesis Factor | 60S ribosomal subunit synthesis and regulate the biological function of cardiac fibroblasts | LAS1L interacts with PELP1, TEX10, and WDR18, the mammalian homologues of the budding yeast Rix1 complex, along with NOL9 and SENP3, to form a novel nucleolar complex that cofractionates with the 60S preribosomal subunit.<br><br>Circ_LAS1L/miR-125b/SFRP5 pathway can regulate the biological function of CF and may play an important role in the process of myocardial fibrosis, thus providing an important theoretical basis for the regulation of myocardial fibrosis after myocardial infarction. | 5   | 27,28 |
| 24 | PIGL    | N-Acetylglucosaminidase              | Proinflammatory responses of the adaptive immune system                                     | Specifically, nuclear PIGL disrupts the interaction between cMyc/BRD4 on the                                                                                                                                                                                                                                                                                                                                                                                                                                 | 5   | 29    |

|    |         |                                                |                                                                    |                                                                                                                                                                                                                                                                                                                                                                                                        |   |    |
|----|---------|------------------------------------------------|--------------------------------------------------------------------|--------------------------------------------------------------------------------------------------------------------------------------------------------------------------------------------------------------------------------------------------------------------------------------------------------------------------------------------------------------------------------------------------------|---|----|
|    |         | nyl-Phosphatidylinositol De-N-Acetylase        | innate and adaptive immune system                                  | distant promoter of target genes and thus decreased the expression of CCL2 and CCL20, which are involved in shaping the immunosuppressive TME by recruiting macrophages and regulatory T cells. PIGL phosphorylation at Y81 by FGFR2 abolishes the interaction of PIGL with importin $\alpha/\beta$ 1, thus retaining PIGL in the cytosol and facilitating tumour evasion by releasing CCL2 and CCL20. |   |    |
| 25 | CDKN1B  | Cyclin-dependent kinase inhibitor 1B           | Proinflammatory responses of the adaptive immune system            | CDKN1B expression is associated with gene sets for the upregulation of T-cell receptor signalling pathways and downregulation of CD8+ T cells.                                                                                                                                                                                                                                                         | 5 | 30 |
| 26 | CDHR3   | Cadherin-Related Family Member 3               | Cell-cell adhesion                                                 | A transmembrane protein with six intracellular cadherin domains, implicated in asthma and other respiratory diseases. Precise function unknown but belonging to a family of cadherin transmembrane proteins.                                                                                                                                                                                           | 5 | 31 |
| 27 | ARHGEF9 | Cdc42 Guanine Nucleotide Exchange Factor 9     | Cell cycle progression                                             | Protein encoded by this gene switches between the activated (GTP-bound) and inactivated (GDP-bound) state, regulating the activity of CDC42 and other genes. Implicated in a number of neuronal disorders.                                                                                                                                                                                             | 5 | 32 |
| 28 | PIK3R1  | Phosphoinositide-3-Kinase Regulatory Subunit 1 | Proinflammatory responses of the adaptive immune system            | PIK3R1 loss of function mutation decreases intrinsic B cell class switching and induces defective Tfh cell function.                                                                                                                                                                                                                                                                                   | 5 | 33 |
| 29 | DHRS3   | Dehydrogenase /Reductase 3                     | Downregulated by inflammation                                      | DHRS3 mRNA is doubled by retinoic acid but reduced by >90% after treatment with lipopolysaccharide (LPS) in the absence and presence of retinoic acid.                                                                                                                                                                                                                                                 | 5 | 34 |
| 30 | NDRG2   | N-Myc Downstream-Regulated Gene 2              | Proinflammatory responses of the adaptive immune system            | NDRG2 expression in breast cancer cells downregulates PD-L1 expression and restores T Cell proliferation in tumour-coculture.                                                                                                                                                                                                                                                                          | 5 | 35 |
| 31 | RBM33   | RNA Binding Motif Protein 33                   | Proinflammatory responses of the innate and adaptive immune system | Recombinant Brugia malayi pepsin inhibitor (rBm33) modulates the host immune responses by skewing towards Th1 responses characterized by secretion of inflammatory molecules such as TNF- $\alpha$ , IL-6, nitric oxide (NO).                                                                                                                                                                          | 5 | 36 |
| 32 | NOL4L   | Nucleolar Protein 4 Like                       | Cell cycle progression                                             | Predicted to be involved in tumour progression and metastasis, and observed to influence the PI3K/AKT pathway                                                                                                                                                                                                                                                                                          | 5 | 37 |

|           |                  |                                                       |                                                                                           |                                                                                                                                                                                                                                                                             |   |    |
|-----------|------------------|-------------------------------------------------------|-------------------------------------------------------------------------------------------|-----------------------------------------------------------------------------------------------------------------------------------------------------------------------------------------------------------------------------------------------------------------------------|---|----|
| <b>33</b> | EPB41L4<br>A-AS1 | EPB41L4A<br>Antisense RNA<br>1                        | Proinflammatory<br>responses of the<br>innate and<br>adaptive<br>immune system            | EPB41L4A-AS1 knockdown activates the<br>NF- $\kappa$ B signalling pathway through a<br>MYD88-dependent regulatory<br>mechanism, promotes glycolysis, and<br>ultimately enhanced the inflammatory<br>response.                                                               | 5 | 38 |
| <b>34</b> | MAPKAP<br>K5-AS1 | MAPKAPK5<br>Antisense RNA<br>1                        | Proinflammatory<br>responses of the<br>innate and<br>adaptive<br>immune system            | Long noncoding RNA MAPKAPK5-AS1<br>promotes lipopolysaccharide-induced<br>inflammatory damage in the myocardium<br>by sponging microRNA-124-3p/E2F3                                                                                                                         | 5 | 39 |
| <b>35</b> | SNHG6            | Small Nucleolar<br>RNA Host Gene<br>6                 | Proinflammatory<br>responses of the<br>innate and<br>adaptive<br>immune system            | Suppression of long noncoding RNA<br>SNHG6 alleviates cigarette smoke-<br>induced lung inflammation by modulating<br>NF- $\kappa$ B signalling.                                                                                                                             | 5 | 40 |
| <b>36</b> | PTGS2            | Prostaglandin-<br>Endoperoxide<br>Synthase 2          | Proinflammatory<br>responses of the<br>innate and<br>adaptive<br>immune system            | Ptgs2 is induced to high levels during<br>inflammation.                                                                                                                                                                                                                     | 5 | 2  |
| <b>37</b> | FAM20A           | Family With<br>Sequence<br>Similarity 20,<br>Member A | Both<br>proinflammatory<br>and anti-<br>inflammatory<br>responses of the<br>immune system | Mutant cells with a significant reduction<br>in FAM20A mRNA and protein levels<br>exhibit a significant increase in<br>inflammatory gene expression, that is, IL-<br>1 $\beta$ and TGF- $\beta$ 1, whereas IL-6 and NF $\kappa$ B1<br>expression was significantly reduced. | 5 | 41 |
| <b>38</b> | EGR1             | Early Growth<br>Response<br>Protein 1                 | Pro-<br>inflammatory<br>responses of the<br>immune system                                 | Stimulates multiple inflammatory<br>mediators after viral infection.                                                                                                                                                                                                        | 5 | 42 |
| <b>39</b> | EGR2             | Early Growth<br>Response<br>Protein 2                 | Pro- and anti-<br>inflammatory<br>responses of the<br>immune system                       | Deletion of both transcription factors<br>Egr2 and Egr3 in lymphocytes resulted in<br>a lethal autoimmune syndrome with<br>excessive serum proinflammatory<br>cytokines but also impaired antigen<br>receptor-induced proliferation of B and T<br>cells.                    | 5 | 43 |
| <b>40</b> | SDF2             | Stromal Derived<br>Factor 2                           | Pro-apoptotic<br>activity                                                                 | SDF2 participates in the cell death<br>program of the UPR during labour, a<br>condition also characterized by cell death<br>for the weakening of the chorion layer at<br>the site of rupture.                                                                               | 5 | 44 |
| <b>41</b> | FERMT3           | FERM Domain<br>containing<br>Kindlin 3                | Proinflammatory<br>responses of the<br>adaptive<br>immune system                          | Mutation in FERMT3 leads to adaptive<br>immune defects in a patient with<br>leukocyte adhesion deficiency type III.                                                                                                                                                         | 5 | 45 |
| <b>42</b> | FCGR1A           | Fc Gamma<br>Receptor 1a                               | Pro-<br>inflammatory<br>responses of the                                                  | Also known as CD64, is a transmembrane<br>glycoprotein with CD32 and CD16                                                                                                                                                                                                   | 5 | 46 |

|    |         |                                                    |                                                           |                                                                                                                                                                                                                                                                                                              |   |       |
|----|---------|----------------------------------------------------|-----------------------------------------------------------|--------------------------------------------------------------------------------------------------------------------------------------------------------------------------------------------------------------------------------------------------------------------------------------------------------------|---|-------|
|    |         |                                                    | adaptive immune system                                    | receptors, encodes a high-affinity Fc-gamma receptor.                                                                                                                                                                                                                                                        |   |       |
| 43 | BATF    | Basic Leucine Zipper ATF-Like Transcription Factor | Anti-inflammatory responses of the adaptive immune system | BATF is required for Treg homeostasis and stability to prevent autoimmune pathology.                                                                                                                                                                                                                         | 5 | 47    |
| 44 | METTL7B | Thiol S-methyltransferase TMT1B                    | Pro-inflammatory responses of the immune system           | METTL7B is upregulated in the blood and peripheral blood mononuclear cells (PBMC) of septic patients                                                                                                                                                                                                         | 5 | 48    |
| 45 | C1QB    | Complement C1q B Chain                             | Pro-inflammatory responses of the innate immune system    | Subcomponent of the complement system of the innate immune system.                                                                                                                                                                                                                                           | 5 | 49    |
| 46 | PEAK3   | PEAK Family Member 3                               | Regulation of cell migration, invasion and proliferation  | A pseudokinase without catalytic activity. Has signalling interactions with the adapter proteins CrkII and Grb2 and the scaffold protein 14-3-3m, controlling signal transduction in cell growth, motility and cancer.                                                                                       | 5 | 50    |
| 47 | FCGR1BP | Fc Gamma Receptor 1b, Pseudogene                   | Non-functional                                            | This gene likely encodes a non-functional protein that is not detectable at the cell surface and binds ligand with low affinity.                                                                                                                                                                             | 5 | 51    |
| 48 | PNP     | Purine Nucleoside Phosphorylase                    | Pro-inflammatory responses of the adaptive immune system  | CX-34 PNP inhibitor shows a complete inhibitory effect on the proliferation of T-cells in an in vitro system, whereas no influence was observed in B-cell lines.<br><br>Mutations of PNP result in a rare autosomal recessive disease, which presents clinically as severe combined immunodeficiency (SCID). | 5 | 52,53 |
| 49 | SRA1    | Steroid Receptor RNA Activator 1                   | Anti-inflammatory responses of the immune system          | SR-A1-/- mice have an aggravated dextran sodium sulfate-induced acute and recurring colitis. This action was associated with a robust activation of both canonical and noncanonical NF-κB signalling in the colon.                                                                                           | 5 | 54    |
| 50 | FCGR1CP | Fc Gamma Receptor 1c, pseudogene                   | Non-functional                                            | A pseudogene thought to encode a non-functional protein. Part of the Fc Gamma receptor 1 family.                                                                                                                                                                                                             | 5 | 55    |
| 51 | RBL2    | Retinoblastoma-Like Protein 2                      | Cell cycle regulation                                     | Predicted to be involved in the initiation and maintenance of cell senescence, in response to CDK-inhibition.                                                                                                                                                                                                | 6 | 56    |
| 52 | FTL     | Ferritin Light Chain                               | Iron homeostasis and acute phase protein                  | Encodes the ferritin light chain, a crucial component of the ferritin complex responsible for intracellular iron storage and regulation. Ferritin is implicated in                                                                                                                                           | 6 | 57    |

the innate immune response against bacteria.

|    |         |                                       |                                                                     |                                                                                                                                                                                                                                                |   |    |
|----|---------|---------------------------------------|---------------------------------------------------------------------|------------------------------------------------------------------------------------------------------------------------------------------------------------------------------------------------------------------------------------------------|---|----|
| 53 | SAA1    | Serum Amyloid A1                      | Pro-inflammatory responses of the innate immune system              | During acute phase, SAA1 displaces apolipoprotein A1 from high density lipoprotein (HDL), leading to a loss of the anti-inflammatory properties of HDL. Highly expressed in monocytes and macrophages. One of the primary acute phase proteins | 6 | 58 |
| 54 | HTRA1   | Serine Protease HTRA1                 | Proinflammatory responses of the innate and adaptive immune system  | A variety of functions such as chaperones and serine proteases, notably represses TGF-beta family signalling by cleaving to proTGF-beta1 in the endoplasmic reticulum, causing its degradation.                                                | 6 | 59 |
| 55 | SAA2    | Serum Amyloid A2                      | Pro-inflammatory responses of the innate immune system              | See SAA1                                                                                                                                                                                                                                       | 6 | 58 |
| 56 | TXNL4A  | Thioredoxin-Like Protein 4A           | Pre-mRNA splicing                                                   | A member of the U5 small ribonucleoprotein particle (snRNP), involved in pre-mRNA splicing. Predicted to be essential for neural crest and craniofacial development.                                                                           | 6 | 60 |
| 57 | PLA2G2A | Phospholipase A2, Membrane Associated | Pro-inflammatory responses of the innate and adaptive immune system | Pla2g2a promotes innate Th2-type immunity lymphocytes to increase B1a cells                                                                                                                                                                    | 6 | 61 |
| 58 | C5      | Complement C5                         | Pro-inflammatory responses of the innate immune system              | Subcomponent of the complement system of the innate immune system. Contributes to the membrane attack complex.                                                                                                                                 | 6 | 62 |
| 59 | C9      | Complement C9                         | Pro-inflammatory responses of the innate immune system              | Subcomponent of the complement system of the innate immune system. Contributes to the membrane attack complex.                                                                                                                                 | 6 | 62 |
| 60 | LBP     | Lipopolysaccharide Binding Protein    | Pro-inflammatory responses of the innate immune system              | Binds bacterial glycolipid to the CD14 receptor, eliciting monocyte responses. Plays a role in the acute phase protein network.                                                                                                                | 6 | 63 |
| 61 | HAMP    | Hepcidin Antimicrobial Peptide        | Iron homeostasis and acute phase protein                            | Hepcidin, the principal regulator of the iron metabolism, is up-regulated in response to inflammatory stimuli, bone morphogenic proteins (BMPs) and iron excess. There are two murine hepcidin                                                 | 6 | 64 |

|    |          |                                                     |                                                                          |                                                                                                                                                                                                                                                                                                                                                                                              |   |       |
|----|----------|-----------------------------------------------------|--------------------------------------------------------------------------|----------------------------------------------------------------------------------------------------------------------------------------------------------------------------------------------------------------------------------------------------------------------------------------------------------------------------------------------------------------------------------------------|---|-------|
|    |          |                                                     |                                                                          | genes: hepcidin-1 (Hamp1) and hepcidin-2 (Hamp2). Hamp1 gene responds to both IL-6 and BMPs while Hamp2 responds to neither.                                                                                                                                                                                                                                                                 |   |       |
| 62 | CRP      | C-Reactive Protein                                  | Pro-inflammatory responses of the innate immune system                   | Plays a variety of key roles in the acute phase by binding to damaged, necrotic and microbial cells, promoting phagocytosis, and activating the complement system.                                                                                                                                                                                                                           | 6 | 65    |
| 63 | ITIH4    | Inter-Alpha-Trypsin Inhibitor Heavy Chain 4         | Pro-inflammatory responses of the innate immune system                   | Found to be a part of the acute phase response network, with increased concentration in serum that correlates with severity of disease.                                                                                                                                                                                                                                                      | 6 | 66    |
| 64 | FTH1     | Ferritin Heavy Chain 1                              | Iron homeostasis and acute phase protein                                 | Encodes the heavy subunit of ferritin, responsible for intracellular iron storage and regulation. Ferritin is implicated in the innate immune response to bacteria.                                                                                                                                                                                                                          | 6 | 57    |
| 65 | CLPSL1   | Colipase Like 1                                     | Unknown                                                                  | Unknown                                                                                                                                                                                                                                                                                                                                                                                      | 6 |       |
| 66 | ATP1B1   | Sodium/Potassium-Transporting ATPase Subunit Beta-1 | Pro-inflammatory responses of the innate immune system                   | The expression of ATP1B1 can inhibit viral replication and increase the levels of IFNs, IFN-stimulated genes, and inflammatory cytokines.                                                                                                                                                                                                                                                    | 6 | 67    |
| 67 | CA6      | Carbonic Anhydrase 6                                | Carbonate dehydratase                                                    | Catalyses the reversible reaction between carbon dioxide and bicarbonate, maintaining pH homeostasis in various tissues and biological fluids.                                                                                                                                                                                                                                               | 6 | 68    |
| 68 | SERPINA4 | Kallistatin                                         | Endopeptidase inhibition and acute phase protein                         | Also known as kallistatin, capable of binding to (thus regulating) kallikrein, which in turn is a serine protein which is capable of cleaving kininogen, releasing vasoactive kinin.<br><br>The SNPs rs2093266 in the <i>SERPINA4</i> and rs1955656 in the <i>SERPINA5</i> are associated with the development of severe AKI (KDIGO stage 2–3) in critically ill patients with septic shock. | 6 | 69,70 |
| 69 | HSPA1A   | Heat Shock kDa Protein 1A                           | Protein homeostasis and anti-inflammatory responses of the immune system | Stabilizes proteins and mediates the folding of newly translated proteins.<br><br>HSPA1A inhibits pyroptosis and neuroinflammation after spinal cord injury via DUSP1 inhibition of the MAPK signalling pathway                                                                                                                                                                              | 6 | 71,72 |
| 70 | BCHE     | Butyrylcholinesterase                               | Choline hydrolysis and anti-inflammatory                                 | A serine hydrolase that catalyses the hydrolysis of various esters. Also enhances the activity of proteases like trypsin.                                                                                                                                                                                                                                                                    | 6 | 73,74 |



|    |         |                                                            |                                                                                                                     |                                                                                                                                                                                                                                                                                                                                          |   |       |
|----|---------|------------------------------------------------------------|---------------------------------------------------------------------------------------------------------------------|------------------------------------------------------------------------------------------------------------------------------------------------------------------------------------------------------------------------------------------------------------------------------------------------------------------------------------------|---|-------|
|    |         |                                                            | responses of the immune system                                                                                      | Dysregulation of butyrylcholinesterase, BCHE gene SNP rs1803274, and pro-inflammatory cytokines in occupational workers                                                                                                                                                                                                                  |   |       |
| 71 | ANTXR2  | ANTXR Adhesion Molecule 2                                  | Pro-inflammatory responses of the adaptive immune system                                                            | ANTXR2 variants is associated with positive HLA-B27 but not with HLA-B27-negative ankylosing spondylitis.                                                                                                                                                                                                                                | 6 | 75    |
| 72 | APOA4   | Apolipoprotein A4                                          | Lipid metabolism                                                                                                    | APOA4 is a potent activator of lecithin-cholesterol acyltransferase.<br><br>HDL anti-inflammatory function is impaired and associated with high SAA1 and low APOA4 levels in aneurysmal subarachnoid haemorrhage                                                                                                                         | 6 | 76,77 |
| 73 | AFM     | Afamin                                                     | Anti-inflammatory responses of the adaptive immune system                                                           | Afamin has been shown to act as an extracellular chaperone for poorly soluble, acylated Wnt proteins, forming a stable, soluble complex with functioning Wnt proteins.<br><br>Activation of Wnt/ $\beta$ -catenin signal induces dendritic cells to differentiate into immune tolerant regulatory dendritic cells in septic mice.        | 6 | 78,79 |
| 74 | CDON    | Cell Adhesion molecule-related/down-regulated by oncogenes | Cell-cell interactions                                                                                              | Part of the cell-surface receptor complex, and a member of the immunoglobulin superfamily. It mediates cell-cell interactions between muscle precursor cells.                                                                                                                                                                            | 6 | 80    |
| 75 | HBA1    | Haemoglobin Subunit Alpha 1                                | Oxygen Transport                                                                                                    | The protein encoded by this gene is a subunit of haemoglobin.                                                                                                                                                                                                                                                                            | 6 | 81    |
| 76 | PGLYRP2 | Peptidoglycan Recognition Protein 2                        | Proinflammatory responses of the innate immune system and anti-inflammatory responses of the adaptive immune system | PGLYRP-2 and Nod2 are both required for arthritis in mice.<br><br>Peptidoglycan recognition protein Pglyrp2 protects mice from psoriasis-like skin inflammation by promoting regulatory T cells and limiting Th17 responses.                                                                                                             | 6 | 82,83 |
| 77 | CLEC3B  | Tetranectin                                                | Proinflammatory responses of the immune system                                                                      | Plasma tetranectin levels and disease activity in patients with rheumatoid arthritis.                                                                                                                                                                                                                                                    | 6 | 84    |
| 78 | EHMT2   | Histone-Lysine-N-Methyltransferase 2                       | Pro-inflammatory responses of the innate immune system                                                              | Treatment of primary bovine cells with the synthetic EHMT2 inhibitor (UNC0638) either before or shortly after virus infection results in a significant increase in transcript levels of bovine IFN- $\beta$ (boIFN- $\beta$ ; 300-fold) and other IFN-inducible genes, including IFN-stimulated gene 15 (ISG-15), myxovirus resistance 1 | 6 | 85    |

(Mx-1), Mx-2, RIG-I, 2',5'-oligoadenylate synthetase 1 (OAS-1), and protein kinase R (PKR). Expression of these factors correlated with a significant decrease in VSV and sMDV viral titers.

|    |         |                                           |                  |                                                                                                                                                                                                                                                                                                                                                                                                                                                                                                                                                                                                                                                                                           |   |    |
|----|---------|-------------------------------------------|------------------|-------------------------------------------------------------------------------------------------------------------------------------------------------------------------------------------------------------------------------------------------------------------------------------------------------------------------------------------------------------------------------------------------------------------------------------------------------------------------------------------------------------------------------------------------------------------------------------------------------------------------------------------------------------------------------------------|---|----|
| 79 | CCDC126 | Coiled-Coil Domain Containing Protein 126 | Unknown function | Unknown function                                                                                                                                                                                                                                                                                                                                                                                                                                                                                                                                                                                                                                                                          | 6 |    |
| 80 | NPS     | Neuropeptide S                            | Neural functions | NPSR expression is markedly increased in asthmatic humans and mice, mainly localized in bronchial epithelial cells. Using ovalbumin (OVA) and papain-induced asthma mouse models, NPSR-deficient mice exhibited significantly alleviated asthma, with reduced small airway lesions and inflammatory infiltration compared with wild-type mice. OVA and papain promote TFEB-mediated autophagy with increased ATG5 and LC3 II expression, and NPS effectively regulates the activation of TFEB and autophagy. In turn, specific TFEB knockdown can restore the effect of exogenous NPS and its receptor antagonist on the autophagy and cytokines secretion in bronchial epithelial cells. | 6 | 86 |

## References

1. Lopez-Castejon, G. & Brough, D. Understanding the mechanism of IL-1 $\beta$  secretion. *Cytokine Growth Factor Rev* **22**, 189-95 (2011).
2. Hellmann, J. *et al.* Atf3 negatively regulates Ptgs2/Cox2 expression during acute inflammation. *Prostaglandins Other Lipid Mediat* **116-117**, 49-56 (2015).
3. Liu, Y. *et al.* Single-cell immune profiling of mouse liver aging reveals Cxcl2+ macrophages recruit neutrophils to aggravate liver injury. *Hepatology* **79**, 589-605 (2024).
4. Li, J.L. *et al.* Neutrophils Self-Regulate Immune Complex-Mediated Cutaneous Inflammation through CXCL2. *J Invest Dermatol* **136**, 416-424 (2016).
5. Wang, Y. & Pan, L. Knockdown of CXCL3-inhibited apoptosis and inflammation in lipopolysaccharide-treated BEAS-2B and HPAEC through inactivating MAPKs pathway. *Allergol Immunopathol (Madr)* **50**, 10-16 (2022).
6. Deban, L., Jaillon, S., Garlanda, C., Bottazzi, B. & Mantovani, A. Pentraxins in innate immunity: lessons from PTX3. *Cell Tissue Res* **343**, 237-49 (2011).
7. Yang, X., Lu, L., Wu, C. & Zhang, F. ATP2B1-AS1 exacerbates sepsis-induced cell apoptosis and inflammation by regulating miR-23a-3p/TLR4 axis. *Allergol Immunopathol (Madr)* **51**, 17-26 (2023).
8. Cook, M.E. *et al.* The ZFP36 family of RNA binding proteins regulates homeostatic and autoreactive T cell responses. *Sci Immunol* **7**, eabo0981 (2022).
9. Moore, M.J. *et al.* ZFP36 RNA-binding proteins restrain T cell activation and anti-viral immunity. *Elife* **7**(2018).
10. Ren, J. *et al.* Serum- and Glucocorticoid-Inducible Kinase 1 Promotes Alternative Macrophage Polarization and Restrains Inflammation through FoxO1 and STAT3 Signaling. *J Immunol* **207**, 268-280 (2021).

11. Whitmore, M.M. *et al.* Negative regulation of TLR-signaling pathways by activating transcription factor-3. *J Immunol* **179**, 3622-30 (2007).
12. Caetano, A.J. *et al.* Spatially resolved transcriptomics reveals pro-inflammatory fibroblast involved in lymphocyte recruitment through CXCL8 and CXCL10. *Elife* **12**, e81525 (2023).
13. Tan, J.E., Wong, S.C., Gan, S.K., Xu, S. & Lam, K.P. The adaptor protein BLNK is required for b cell antigen receptor-induced activation of nuclear factor-kappa B and cell cycle entry and survival of B lymphocytes. *J Biol Chem* **276**, 20055-63 (2001).
14. Fu, C., Turck, C.W., Kurosaki, T. & Chan, A.C. BLNK: a central linker protein in B cell activation. *Immunity* **9**, 93-103 (1998).
15. Horsnell, H.L., Cao, W.H., Belz, G.T., Mueller, S.N. & Alexandre, Y.O. The transcription factor SpiB regulates the fibroblastic reticular cell network and CD8(+) T-cell responses in lymph nodes. *Immunol Cell Biol* **102**, 269-279 (2024).
16. Santiago, T. *et al.* FCRLA is a resident endoplasmic reticulum protein that associates with intracellular Igs, IgM, IgG and IgA. *Int Immunol* **23**, 43-53 (2011).
17. Reshetnikova, E.S. *et al.* Differential expression of FCRLA in naïve and activated mouse B cells. *Cell Immunol* **272**, 182-92 (2012).
18. de Lima, D.S. *et al.* Long noncoding RNAs are involved in multiple immunological pathways in response to vaccination. *Proc Natl Acad Sci U S A* **116**, 17121-17126 (2019).
19. Landi, A. *et al.* Genome-wide shRNA screening identifies host factors involved in early endocytic events for HIV-1-induced CD4 down-regulation. *Retrovirology* **11**, 118 (2014).
20. GeneCards the human gene database. FCRL2 Gene - Fc Receptor Like 2. Vol. 2024 (2024).
21. GeneCards the human gene database. CD19 Gene - CD19 Molecule. Vol. 2024 (2024).
22. Yang, G. *et al.* Characterization of the immune regulatory property of CD22(+) CD9(+) B cells. *Immunology* **167**, 328-339 (2022).
23. Onodera, T., Poe, J.C., Tedder, T.F. & Tsubata, T. CD22 regulates time course of both B cell division and antibody response. *J Immunol* **180**, 907-13 (2008).
24. GeneCards the human gene database. MS4A1 Gene - Membrane Spanning 4-Domains A1. Vol. 2024 (2024).
25. Silva, P. *et al.* Autosomal recessive agammaglobulinemia due to defect in  $\mu$  heavy chain caused by a novel mutation in the IGHM gene. *Genes Immun* **18**, 197-199 (2017).
26. Ren, J. *et al.* Foxp1 is critical for the maintenance of regulatory T-cell homeostasis and suppressive function. *PLoS Biology* **17**, e3000270 (2019).
27. Castle, C.D., Cassimere, E.K. & Denicourt, C. LAS1L interacts with the mammalian Rix1 complex to regulate ribosome biogenesis. *Mol Biol Cell* **23**, 716-28 (2012).
28. Sun, L.Y. *et al.* Circ\_LAS1L regulates cardiac fibroblast activation, growth, and migration through miR-125b/SFRP5 pathway. *Cell Biochem Funct* **38**, 443-450 (2020).
29. Yu, H. *et al.* Elevated nuclear PIGL disrupts the cMyc/BRD4 axis and improves PD-1 blockade therapy by dampening tumor immune evasion. *Cell Mol Immunol* **20**, 867-880 (2023).
30. Kim, H.S., Noh, Y.K., Min, K.W. & Kim, D.H. Low CDKN1B Expression Associated with Reduced CD8+ T Lymphocytes Predicts Poor Outcome in Breast Cancer in a Machine Learning Analysis. *J Pers Med* **14**(2023).
31. Bønnelykke, K. *et al.* A genome-wide association study identifies CDHR3 as a susceptibility locus for early childhood asthma with severe exacerbations. *Nat Genet* **46**, 51-5 (2014).
32. Kalscheuer, V.M. *et al.* A balanced chromosomal translocation disrupting ARHGEF9 is associated with epilepsy, anxiety, aggression, and mental retardation. *Hum Mutat* **30**, 61-8 (2009).
33. Nguyen, T. *et al.* Human PIK3R1 mutations disrupt lymphocyte differentiation to cause activated PI3K $\delta$  syndrome 2. *J Exp Med* **220**(2023).
34. Zolfaghari, R., Chen, Q. & Ross, A.C. DHRS3, a retinal reductase, is differentially regulated by retinoic acid and lipopolysaccharide-induced inflammation in THP-1 cells and rat liver. *Am J Physiol Gastrointest Liver Physiol* **303**, G578-88 (2012).
35. Lee, A. *et al.* NDRG2 Expression in Breast Cancer Cells Downregulates PD-L1 Expression and Restores T Cell Proliferation in Tumor-Coculture. *Cancers (Basel)* **13**(2021).
36. Sreenivas, K., Kalyanaraman, H., Babu, S. & Narayanan, R.B. Recombinant *Brugia malayi* pepsin inhibitor (rBm33) exploits host signaling events to regulate inflammatory responses associated with lymphatic filarial infections. *Microb Pathog* **112**, 195-208 (2017).

37. Lin, F., Zhou, J., Li, X. & Wang, X. NOL4L, a novel nuclear protein, promotes cell proliferation and metastasis by enhancing the PI3K/AKT pathway in ovarian cancer. *Biochem Biophys Res Commun* **559**, 121-128 (2021).
38. Wang, Z. *et al.* Downregulation of lncRNA EPB41L4A-AS1 Mediates Activation of MYD88-Dependent NF- $\kappa$ B Pathway in Diabetes-Related Inflammation. *Diabetes Metab Syndr Obes* **14**, 265-277 (2021).
39. Chen, W. *et al.* Long noncoding RNA MAPKAPK5-AS1 promoted lipopolysaccharide-induced inflammatory damage in the myocardium by sponging microRNA-124-3p/E2F3. *Mol Med* **27**, 131 (2021).
40. Yang, J. *et al.* Suppression of long noncoding RNA SNHG6 alleviates cigarette smoke-induced lung inflammation by modulating NF- $\kappa$ B signaling. *Environ Toxicol* **39**, 2634-2641 (2024).
41. Sriwattanapong, K. *et al.* In-depth investigation of FAM20A insufficiency effects on deciduous dental pulp cells: Altered behaviours, osteogenic differentiation, and inflammatory gene expression. *Int Endod J* **57**, 745-758 (2024).
42. Lehman, C.W. *et al.* EGR1 upregulation during encephalitic viral infections contributes to inflammation and cell death. *Viruses* **14**, 1210 (2022).
43. Li, S. *et al.* The transcription factors Egr2 and Egr3 are essential for the control of inflammation and antigen-induced proliferation of B and T cells. *Immunity* **37**, 685-696 (2012).
44. Lorenzon-Ojea, A.R., Yung, H.W., Burton, G.J. & Bevilacqua, E. The potential contribution of stromal cell-derived factor 2 (SDF2) in endoplasmic reticulum stress response in severe preeclampsia and labor-onset. *Biochim Biophys Acta Mol Basis Dis* **1866**, 165386 (2020).
45. Suratannon, N. *et al.* Adaptive immune defects in a patient with leukocyte adhesion deficiency type III with a novel mutation in FERMT3. *Pediatr Allergy Immunol* **27**, 214-7 (2016).
46. GeneCards the human gene database. FCGR1A Gene - Fc Gamma Receptor Ia. Vol. 2025 (2024).
47. Khatun, A. *et al.* BATF is Required for Treg Homeostasis and Stability to Prevent Autoimmune Pathology. *Adv Sci (Weinh)* **10**, e2206692 (2023).
48. Huang, D. & Yan, H. Methyltransferase like 7B is upregulated in sepsis and modulates lipopolysaccharide-induced inflammatory response and macrophage polarization. *Bioengineered* **13**, 11753-11766 (2022).
49. Nayak, A., Pednekar, L., Reid, K.B. & Kishore, U. Complement and non-complement activating functions of C1q: a prototypical innate immune molecule. *Innate Immun* **18**, 350-63 (2012).
50. Roy, M.J. *et al.* Structural mapping of PEAK pseudokinase interactions identifies 14-3-3 as a molecular switch for PEAK3 signaling. *Nat Commun* **14**, 3542 (2023).
51. GeneCards the human gene database. FCGR1BP Gene - Fc Gamma Receptor Ib, Pseudogene. Vol. 2025 (2025).
52. Wada, Y. *et al.* BCX-34: a novel T-cell selective immunosuppressant: purine nucleoside phosphorylase (PNP) inhibitor. *Artif Organs* **20**, 849-52 (1996).
53. Dalal, I., Grunebaum, E., Cohen, A. & Roifman, C.M. Two novel mutations in a purine nucleoside phosphorylase (PNP)-deficient patient. *Clin Genet* **59**, 430-7 (2001).
54. Zong, G. *et al.* SR-A1 suppresses colon inflammation and tumorigenesis through negative regulation of NF- $\kappa$ B signaling. *Biochem Pharmacol* **154**, 335-343 (2018).
55. GeneCards the human gene database. FCGR1CP Gene - Fc Gamma Receptor Ic, Pseudogene. Vol. 2025 (2025).
56. Fiorentino, F.P., Symonds, C.E., Macaluso, M. & Giordano, A. Senescence and p130/Rb12: a new beginning to the end. *Cell Res* **19**, 1044-51 (2009).
57. Simonsen, K.T. *et al.* Quantitative proteomics identifies ferritin in the innate immune response of *C. elegans*. *Virulence* **2**, 120-130 (2011).
58. Jumeau, C. *et al.* Expression of SAA1, SAA2 and SAA4 genes in human primary monocytes and monocyte-derived macrophages. *PLoS One* **14**, e0217005 (2019).
59. Shiga, A. *et al.* Cerebral small-vessel disease protein HTRA1 controls the amount of TGF- $\beta$ 1 via cleavage of proTGF- $\beta$ 1. *Hum Mol Genet* **20**, 1800-10 (2011).
60. Park, B.Y., Tachi-Duprat, M., Ihewulezi, C., Devotta, A. & Saint-Jeannet, J.P. The Core Splicing Factors EFTUD2, SNRPB and TXNL4A Are Essential for Neural Crest and Craniofacial Development. *J Dev Biol* **10**(2022).
61. Shinton, S.A., Brill-Dashoff, J. & Hayakawa, K. Pla2g2a promotes innate Th2-type immunity lymphocytes to increase B1a cells. *Sci Rep* **12**, 14899 (2022).
62. Stanley, K.K., Kocher, H.P., Luzio, J.P., Jackson, P. & Tschopp, J. The sequence and topology of human complement component C9. *Embo j* **4**, 375-82 (1985).
63. Schumann, R.R. & Zweigner, J. A novel acute-phase marker: lipopolysaccharide binding protein (LBP). *Clin Chem Lab Med* **37**, 271-4 (1999).

64. Truksa, J., Lee, P. & Beutler, E. The role of STAT, AP-1, E-box and TIEG motifs in the regulation of hepcidin by IL-6 and BMP-9: lessons from human HAMP and murine Hamp1 and Hamp2 gene promoters. *Blood Cells Mol Dis* **39**, 255-62 (2007).
65. Del Giudice, M. & Gangestad, S.W. Rethinking IL-6 and CRP: Why they are more than inflammatory biomarkers, and why it matters. *Brain Behav Immun* **70**, 61-75 (2018).
66. Pineiro, M. *et al.* ITIH4 (inter-alpha-trypsin inhibitor heavy chain 4) is a new acute-phase protein isolated from cattle during experimental infection. *Infection and Immunity* **72**, 3777-3782 (2004).
67. Cao, W. *et al.* Inducible ATP1B1 Upregulates Antiviral Innate Immune Responses by the Ubiquitination of TRAF3 and TRAF6. *J Immunol* **206**, 2668-2681 (2021).
68. Kivela, J., Parkkila, S., Parkkila, A.K., Leinonen, J. & Rajaniemi, H. Salivary carbonic anhydrase isoenzyme VI. *J Physiol* **520 Pt 2**, 315-20 (1999).
69. Chao, J. & Chao, L. Biochemistry, regulation and potential function of kallistatin. *Biol Chem Hoppe Seyler* **376**, 705-13 (1995).
70. Vilander, L.M., Kaunisto, M.A., Vaara, S.T. & Pettilä, V. Genetic variants in SERPINA4 and SERPINA5, but not BCL2 and SIK3 are associated with acute kidney injury in critically ill patients with septic shock. *Crit Care* **21**, 47 (2017).
71. Hartl, F.U. Molecular chaperones in cellular protein folding. *Nature* **381**, 571-580 (1996).
72. He, X. *et al.* HSPA1A inhibits pyroptosis and neuroinflammation after spinal cord injury via DUSP1 inhibition of the MAPK signaling pathway. *Mol Med* **31**, 53 (2025).
73. Darvesh, S., Hopkins, D.A. & Geula, C. Neurobiology of butyrylcholinesterase. *Nat Rev Neurosci* **4**, 131-8 (2003).
74. Khan, S.A. *et al.* Dysregulation of butyrylcholinesterase, BCHE gene SNP rs1803274, and pro-inflammatory cytokines in occupational workers. *Environ Res* **220**, 115195 (2023).
75. Karaderi, T. *et al.* Ankylosing spondylitis is associated with the anthrax toxin receptor 2 gene (ANTXR2). *Ann Rheum Dis* **73**, 2054-8 (2014).
76. Karathanasis, S.K., Oettgen, P., Haddad, I.A. & Antonarakis, S.E. Structure, evolution, and polymorphisms of the human apolipoprotein A4 gene (APOA4). *Proc Natl Acad Sci U S A* **83**, 8457-61 (1986).
77. Azúa-López, Z.R. *et al.* HDL anti-inflammatory function is impaired and associated with high SAA1 and low APOA4 levels in aneurysmal subarachnoid hemorrhage. *J Cereb Blood Flow Metab* **43**, 1919-1930 (2023).
78. Naschberger, A. *et al.* Structural Evidence for a Role of the Multi-functional Human Glycoprotein Afamin in Wnt Transport. *Structure* **25**, 1907-1915.e5 (2017).
79. Cheng, X., Li, Y. & Wang, H. Activation of Wnt/ $\beta$ -catenin signal induces DCs to differentiate into immune tolerant regDCs in septic mice. *Mol Immunol* **172**, 38-46 (2024).
80. Sanchez-Arrones, L., Cardozo, M., Nieto-Lopez, F. & Bovolenta, P. Cdon and Boc: Two transmembrane proteins implicated in cell-cell communication. *Int J Biochem Cell Biol* **44**, 698-702 (2012).
81. Shaanan, B. Structure of human oxyhaemoglobin at 2.1 Å resolution. *J Mol Biol* **171**, 31-59 (1983).
82. Saha, S. *et al.* PGLYRP-2 and Nod2 are both required for peptidoglycan-induced arthritis and local inflammation. *Cell Host Microbe* **5**, 137-50 (2009).
83. Park, S.Y., Gupta, D., Hurwich, R., Kim, C.H. & Dziarski, R. Peptidoglycan recognition protein Pglyrp2 protects mice from psoriasis-like skin inflammation by promoting regulatory T cells and limiting Th17 responses. *J Immunol* **187**, 5813-23 (2011).
84. Kamper, E.F., Kopeikina, L.T., Koutsoukos, V. & Stavridis, J. Plasma tetranectin levels and disease activity in patients with rheumatoid arthritis. *J Rheumatol* **24**, 262-8 (1997).
85. Singh, N., Ramírez-Carvajal, L., de Los Santos, T., Golding, M.C. & Long, C.R. Inhibition of EHMT2 Induces a Robust Antiviral Response Against Foot-and-Mouth Disease and Vesicular Stomatitis Virus Infections in Bovine Cells. *J Interferon Cytokine Res* **36**, 37-47 (2016).
86. Wang, Z. *et al.* Neuropeptide S and its receptor aggravated asthma via TFEB dependent autophagy in bronchial epithelial cells. *Respir Res* **26**, 50 (2025).
