# Supplementary material for: Integrated transcriptomic and proteomic analysis reveals innate and adaptive immune dynamics in systemic autoinflammatory diseases
Source: Research Square preprint supplement (doi:10.21203/rs.3.rs-6173310/v1), 2025-11-01

Supplementary Figure 1: A functional protein association network constructed from the top 10 IL1B co-expressing genes and the top 10 BLNK co-expressing genes using the String Database. ATP2B1-AS1 is an antisense RNA that does not encode a protein. Human FAM30A and IGHM are not available in the STRING Database (<https://string-db.org/>). The functional STRING association for SNX22 and SKG1 with this network has not yet been reported.

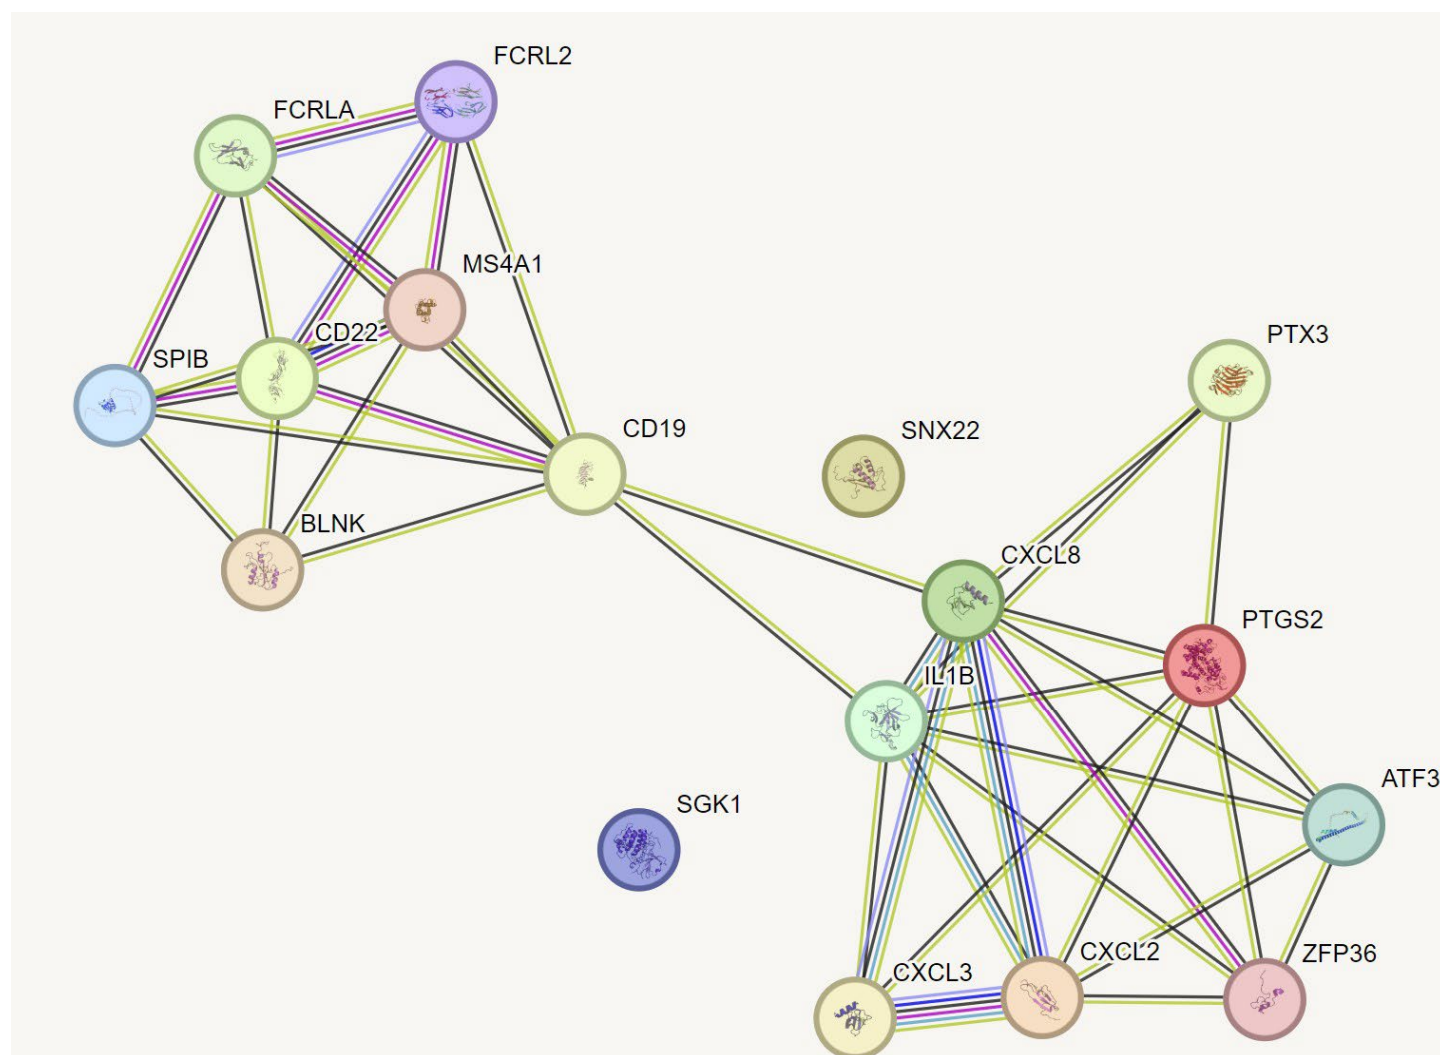

Supplement: Supplementary file 3 [file c8c521b796c99fa455657206.pdf]
