# Supplementary material for: Integrated transcriptomic and proteomic analysis reveals innate and adaptive immune dynamics in systemic autoinflammatory diseases
Source: Research Square preprint supplement (doi:10.21203/rs.3.rs-6173310/v1), 2025-11-01

Supplementary Figure 2: A functional protein association network of the top 30 most differentially expressed proteins from proteomic profiles generated using the Somalogic Inc platform. The network was constructed using the String Database (string-db.org). ATP2B1-AS1 is an antisense non-protein coding RNA and therefore does not appear in the network. The functional STRING association for HTRA1, CCDC126, CDON, HSPA1, CLPSL1, TXNL4A, ATP1B1, ANTRX2, NPS, EHMT2 and HBA1 with this network has not yet been reported.

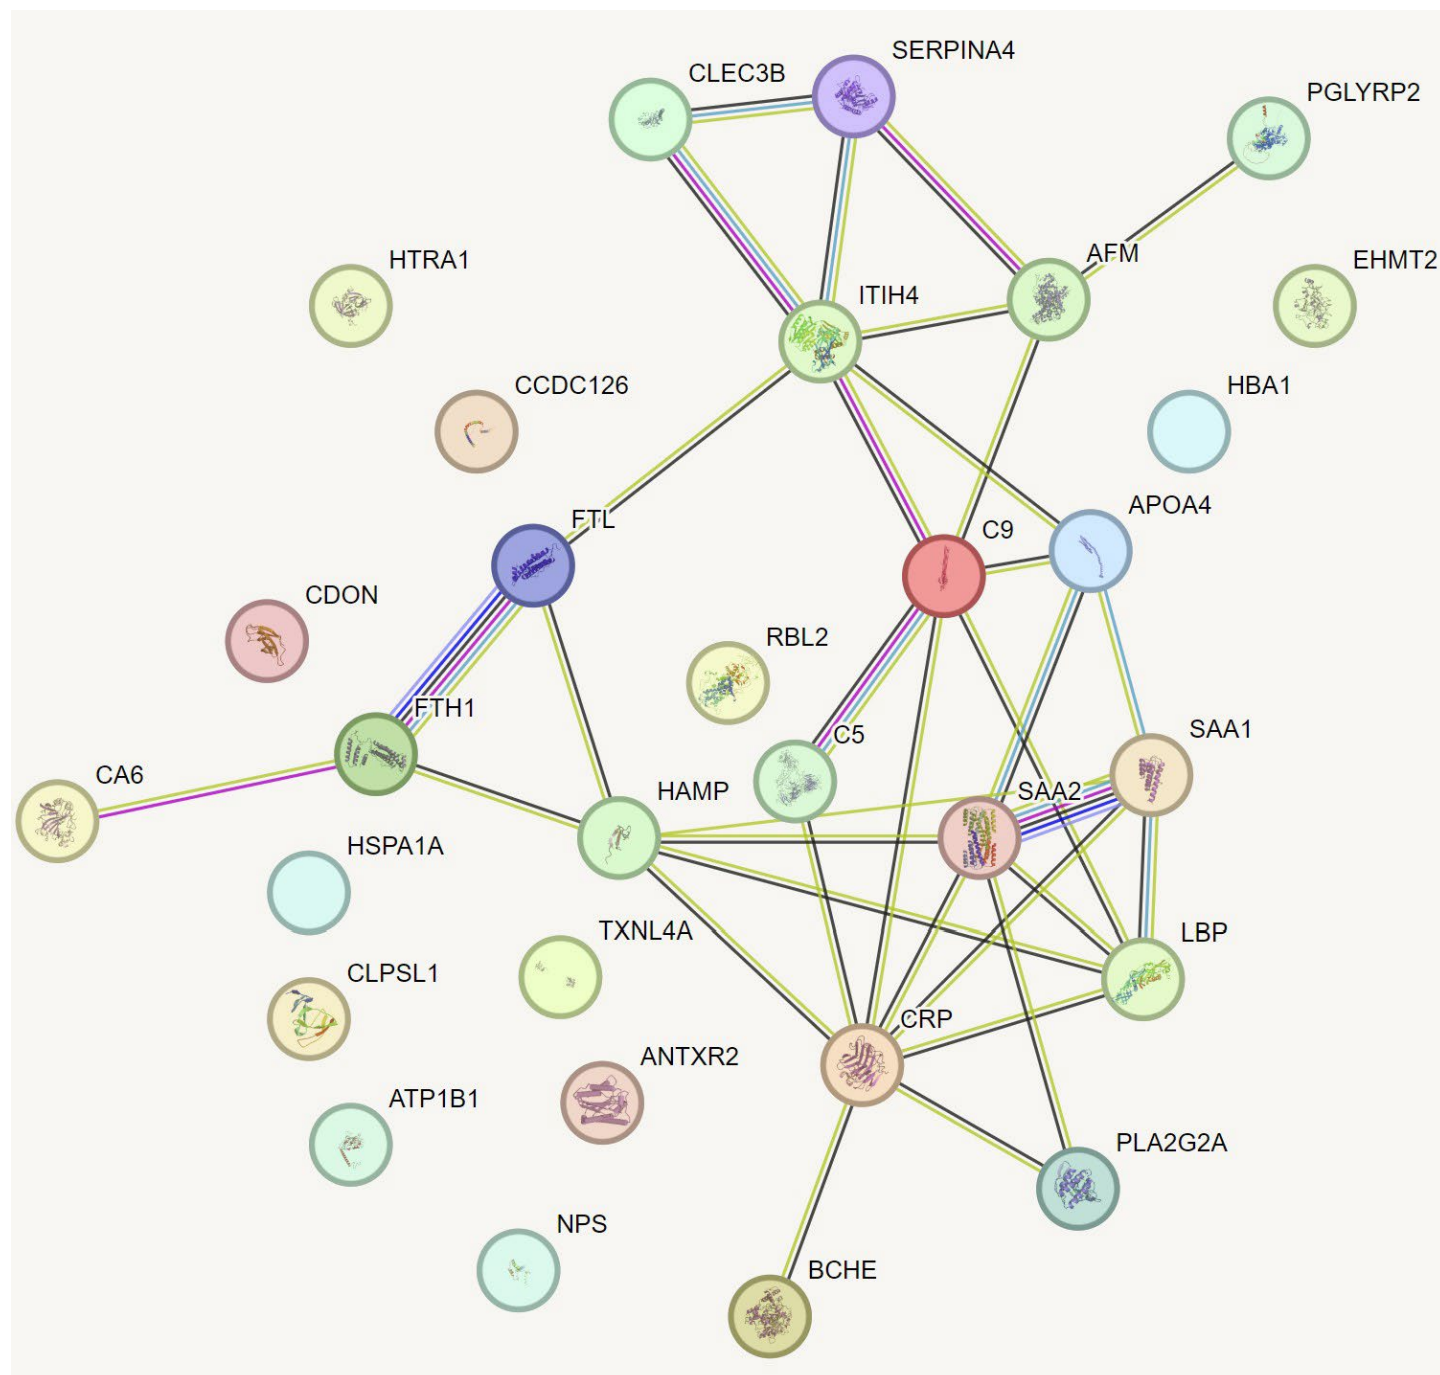

Supplement: Supplementary file 4 [file d05709869ca3e6490bfd819a.pdf]
